# Supplementary material for: Geosensor Data Representation Using Layered Slope Grids
Source: MDPI journal article supplement (doi:10.3390/s121217074), 2012-12-12
Supplement: s1 [file s1]

*Correction*

## **Correction: Lee, Y. *et al.* Geosensor Data Representation Using Layered Slope Grids. *Sensors* 2012, 12, 17074-17093**

**Yongmi Lee<sup>1</sup>, Young Jin Jung<sup>2,\*</sup>, Kwang Woo Nam<sup>3</sup>, Silvia Nittel<sup>4</sup>, Kate Beard<sup>4</sup>  
and Keun Ho Ryu<sup>1</sup>**

<sup>1</sup> Database/Bioinformatics Lab, Chungbuk National University, Cheongju 361-763, Korea; E-Mails: ymlee@dblab.chungbuk.ac.kr (Y.L.); khryu@dblab.chungbuk.ac.kr (K.H.R.)

<sup>2</sup> Korea Institute of Science Technology and Information, 245 Daehangno, Yuseong, Daejeon 305-806, Korea

<sup>3</sup> Department of Computer and Information Engineering, Kunsan National University, Kunsan 573-701, Korea; E-Mail: kwnam@kunsan.ac.kr

<sup>4</sup> School of Computing and Information Science, University of Maine, Orono, 5711 Boardman Hall, Rm. 344, Orono, ME 04467, USA; E-Mails: nittel@spatial.maine.edu (S.N.); beard@spatial.maine.edu (K.B.)

\* Author to whom correspondence should be addressed; E-Mail: yjung@kisti.re.kr; Tel.: +82-42-869-0549; Fax: +82-42-869-0799.

*Received: 4 March 2013; in revised form: 16 April 2013 / Accepted: 16 April 2013 /*

*Published: 22 April 2013*

---

There are four mistakes at the table derived from the (c) surface slope of Figure 4 in [1]. The direction numbers are derived according to (a) slope directions. The overall direction number should be changed from 6 to 4. The distinct direction number between the 1st and 2nd subcells should be changed from 0 to 8. The distinct direction number between the 2nd and 3rd subcells should be changed from 8 to 4. The distinct direction number between the 3rd and 4th subcells should be changed from 4 to 6. The authors would like to apologize for any inconvenience this may have caused to the readers of this journal.

The new figure is provided below:

Figure 4. The layered slopes for data abstraction in a cell.

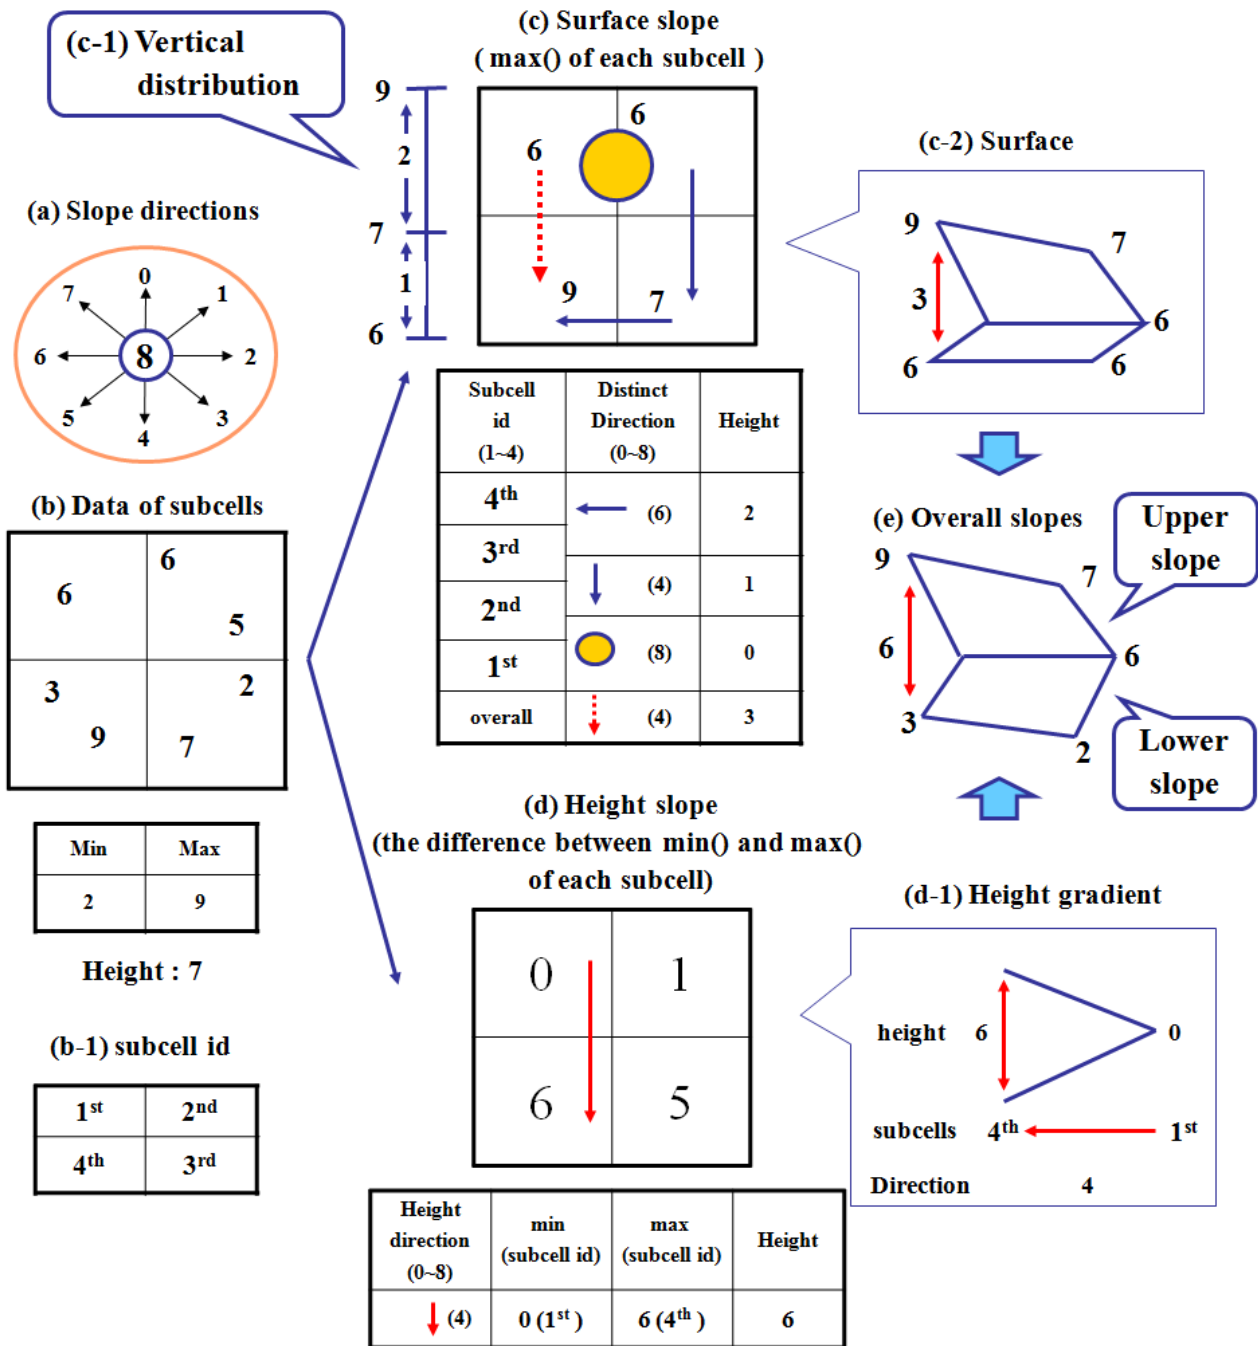

Reference

1. Lee, Y.; Jung, Y.J.; Nam, K.W.; Nittel, S.; Beard, K.; Ryu, K.H. Geosensor Data Representation Using Layered Slope Grids. *Sensors* **2012**, *12*, 17074–17093.
